# Supplementary material for: A recyclable polyoxometalate-based supramolecular chemosensor for efficient detection of carbon dioxide
Source: Royal Society of Chemistry journal article supplement (doi:10.1039/c5sc02020d), 2015-01-01
Supplement: c5sc02020d1.pdf [file c5sc02020d1.pdf]

## Electronic Supplementary Information

for

### **A Recyclable Polyoxometalate-based Supramolecular Chemosensor for Efficient Detection of Carbon Dioxide**

Haibing Wei,<sup>ab</sup> Jinlong Zhang,<sup>a</sup> Nan Shi,<sup>a</sup> Yang Liu,<sup>a</sup> Ben Zhang,<sup>a</sup> Jie Zhang,<sup>\*a</sup> and  
Xinhua Wan<sup>\*a</sup>

<sup>a</sup> Beijing National Laboratory for Molecular Sciences, Key Laboratory of Polymer Chemistry and Physics of Ministry of Education, College of Chemistry and Molecular Engineering, Peking University, Beijing 100871, China

<sup>b</sup> School of Chemistry and Chemical Engineering, Provincial Key Laboratory of Advanced Functional Materials and Devices, Hefei University of Technology, Hefei, Anhui 230009, China.

\*To whom correspondence should be addressed.

E-mail: [jz10@pku.edu.cn](mailto:jz10@pku.edu.cn) (J. Z.) and [xhwan@pku.edu.cn](mailto:xhwan@pku.edu.cn) (X.H. W.)

## Experimental Section

**Materials and Instruments.**  $\text{Na}_9\text{DyW}_{10}\text{O}_{36}$  was prepared as described by Caronado.<sup>[S1]</sup> Block copolymer  $\text{PEO}_{114}\text{-}b\text{-PDMAEMA}_{16}$  (PDI=1.2) was purchased from Polymer Source, Canada. The deprotonation of  $\text{PEO}_{114}\text{-}b\text{-PDMAEMA}_{16}$  was carried out by adjusting its aqueous solution with NaOH to pH = 12, and then extracting with  $\text{CH}_2\text{Cl}_2$ , finally precipitated in *n*-hexane/ethyl ether (v/v, 7/3). All aqueous solutions of polyoxometalate and polymers were prepared using ultrapure water from a Millipore Milli-Q system.  $\text{CO}_2$  (99.99%) and argon (99.999%) were purchased from Beijing Haike Yuanchang general aeriform Co. Ltd and used as received.

$^1\text{H}$  NMR spectra were recorded on a Bruker 400 AVANCE III spectrometer operating at 400.23 MHz, using  $\text{D}_2\text{O}$  as solvent. TEM images were obtained on a JEM 2100 instrument operating at an acceleration voltage of 200 kV. The specimen was prepared by drop-casting the sample solution onto a carbon-coated copper grid for a few minutes. Excess solution was blotted away with a strip of filter paper, and the sample grid was dried in air. Photoluminescence measurements were performed on an FLS 920 Steady State & Time-resolved Fluorescence Spectrometer (Edinburgh Instruments Ltd.). Small-angle X-ray scattering (SAXS) measurements were performed using a SAXSess (Anton Paar) equipped with Kratky block-collimation system. The scattering pattern was recorded on an imaging plate (IP) with a pixel size of  $42.3 \times 42.3 \mu\text{m}^2$  which extended to the high-angle range (the  $q$  range covered by the IP was from 0.06 to  $29 \text{ nm}^{-1}$ ). We carefully loaded the  $\text{DyW}_{10}/\text{PEO}\text{-}b\text{-PDMAEMA}$  solution samples before and after exposure to  $\text{CO}_2$  and upon Ar bubbling that removes  $\text{CO}_2$  for SAXS measurement into a quartz capillary with a diameter of 1 mm at ambient temperature. The scattering curve of pure water filled in the same capillary was measured as the background. Background subtraction and desmearing were conducted by using SAXSquant 3.6 software. The pairdistance distribution function (PDDF) of scattering curves was calculated using the generalized indirect Fourier transform (GIFT)<sup>[S2]</sup> program included in the SAXSess software package. The

quantum yields of the complex solution were determined by the relative method with tryptophan as standard, excited at 280 nm.

### Calculation of protonation degree of DMAEMA in the copolymer PEO<sub>114</sub>-*b*-PDMAEMA<sub>16</sub>

The pH change was measured using a pH-meter (Mettler). The protonation equation of DMAEMA can be expressed as follows:

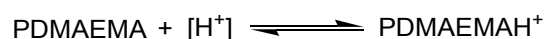

The degree of protonation ( $\delta$ ) of DMAEMA in diblock copolymer PEO-*b*-PDMAEMA mainly depends on its  $\text{p}K_a$ . As many reports mentioned, the  $\text{p}K_a$  of PDMAEMA was approximately 7.4.<sup>[S3]</sup> Therefore, the quantity of the protonated DMAEMA in every PEO-*b*-PDMAEMA chain at different pHs can be calculated according to eqs. (1), (2), and (3):

$$K_a = \frac{[\text{DMAEMA}] \cdot [\text{H}^+]}{[\text{DMAEMAH}^+]} \quad (1)$$

$$\text{p}K_a = \text{pH} + \log_{10} \frac{[\text{DMAEMAH}^+]}{[\text{DMAEMA}]} \quad (2)$$

$$\delta = \frac{[\text{DMAEMAH}^+]}{[\text{DMAEMA}] + [\text{DMAEMAH}^+]} \quad (3)$$

where  $[\text{DMAEMA}]$  and  $[\text{DMAEMAH}^+]$  are the concentration of non-protonated DMAEMA molecules and protonated DMAEMA molecules in copolymer PEO-*b*-PDMAEMA, respectively. The pH value of initial DyW<sub>10</sub>/PEO-*b*-PDMAEMA complex solution was about 7.2, and the  $\delta$  can be calculated to be 61%. Upon alternative treatment with CO<sub>2</sub> and Ar, the pH of DyW<sub>10</sub>/PEO-*b*-PDMAEMA complex solution can be switched between 4.8 and 6.9. Thus,  $\delta$  can be calculated to be 99.8% at pH 4.80 and 75.1% at pH 6.92.

### Fluorescence lifetime analysis

The fluorescence decay measurements were performed using a time-correlated single-

photon counting technique, in which the fluorescence decay was monitored at 476 nm. The fluorescence decays were fitted by the following equation:

$$I(t) = \sum f_i \exp(-t / \tau_i)$$

where  $f_i$  represents fractional contribution to the total fluorescence decay.<sup>[S4]</sup> In DyW<sub>10</sub> aqueous solution (0.2 mg mL<sup>-1</sup>), the DyW<sub>10</sub> luminescence showed first-order decay with a lifetime 5.2 μs. With the addition of PEO-*b*-PDMAEMA, the decay curves cannot be fitted by a single exponential but at least three lifetimes, where the lifetime was much longer. In addition, excellent first-order decay was turned up as CO<sub>2</sub> gas bubbled into the DyW<sub>10</sub> aqueous solution in the presence of PEO-*b*-PDMAEMA, where the lifetime is much longer, as to 57.5 μs. Interestingly, after degassing CO<sub>2</sub> dissolved in the solution by purging Ar, the decay lifetimes was restored to three lifetimes, that is,  $\tau_1 \approx 4.5 \mu\text{s}$ ,  $\tau_2 \approx 20 \mu\text{s}$ , and  $\tau_3 \approx 60 \mu\text{s}$ , which is similar to the initial state of DyW<sub>10</sub>/PEO-*b*-PDMAEMA complex. The fitting parameters of each state are summarized in Table S1.

### Calculation the number of water molecules ( $q$ ) coordinated to Dy<sup>3+</sup> ion

The values of decay lifetime of DyW<sub>10</sub>/PEO-*b*-PDMAEMA complex in H<sub>2</sub>O solution and its corresponding D<sub>2</sub>O solution were recorded. According to the literature,<sup>[S5]</sup> the number of water molecules  $q$  coordinated at the dysprosium center can be calculated by using the following equation:

$$q = 2.61 \times 10^{-2} (\tau_{\text{H}_2\text{O}}^{-1} - \tau_{\text{D}_2\text{O}}^{-1})$$

where  $\tau_{\text{H}_2\text{O}}^{-1}$  and  $\tau_{\text{D}_2\text{O}}^{-1}$  are the reciprocal experimental lifetimes in H<sub>2</sub>O and D<sub>2</sub>O solutions in ms<sup>-1</sup>, respectively. For example, the experimental lifetime of DyW<sub>10</sub> in H<sub>2</sub>O and D<sub>2</sub>O solutions (0.2 mg mL<sup>-1</sup>) is 0.0053 and 0.0954 ms, respectively. Therefore, the  $q$  value was calculated to be 4.6, indicating that there are probably four water molecules coordinated to Dy<sup>3+</sup> ion. Likewise, the experimental lifetimes of DyW<sub>10</sub>/PEO-*b*-PDMAEMA complex in H<sub>2</sub>O and D<sub>2</sub>O solutions upon with CO<sub>2</sub> treatment is 0.06 and 0.1 ms, respectively, therefore, the  $q$  value was calculated to be

0.18, indicating that probably no water molecules was coordinated to Dy<sup>3+</sup> ion.

### References:

- S1. AlDamen, M. A.; Cardona-Serra, S.; Clemente-Juan, J. M.; Coronado, E.; Gaita-Arino, A.; Marti-Gastaldo, C.; Luis, F.; Montero, O. *Inorg. Chem.* **2009**, *48*, 3467.
- S2. (a) Lof, D.; Tomsic, M.; Glatter, O.; Fritz-Popovski, G.; Schillen, K. *J. Phy. Chem. B* **2009**, *113*, 5478. (b) Glatter, O.; Fritz, G.; Lindner, H.; Brunner-Popela, J.; Mittelbach, R.; Strey, R.; Egelhaaf, S. U. *Langmuir* **2000**, *16*, 8692. (c) Weyerich, B.; Brunner-Popela, J.; Glatter, O. *J. Appl. Crystallogr.* **1999**, *32*, 197.
- S3. (a) Bütün, V.; Armes, S. P.; Billingham, N. C. *Polymer* **2001**, *42*, 5993. (b) Fournier, D.; Hoogenboom, R.; Thijs, H. M. L.; Paulus, R. M.; Schubert, U. S. *Macromolecules* **2007**, *40*, 915.
- S4. Lakowicz, J. R., *Principles of Fluorescence Spectroscopy, 3rd. ed.; Springer: Berlin, 2006*, 101-103.
- S5. Hall, C. D.; Sharpe, N. W. *J. Photochem. Photobio. A: Chem.* **1990**, *52*, 363.

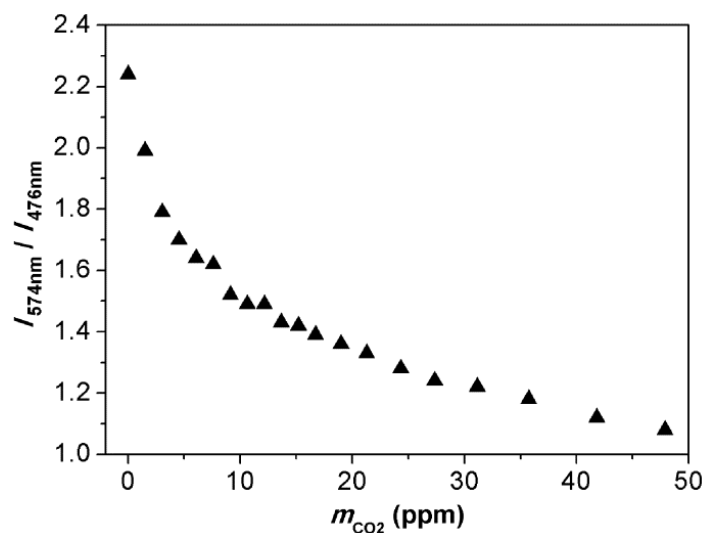

**Figure S1.** Variation of  $I_{4F9/2 \rightarrow 6H13/2} / I_{4F9/2 \rightarrow 6H15/2}$  values in the PL spectra of DyW<sub>10</sub>/PEO-*b*-PDMAEMA hybrid complex in aqueous solution as a function of the concentration of CO<sub>2</sub> at 25 °C ( $\lambda_{\text{ex}} = 280$  nm).

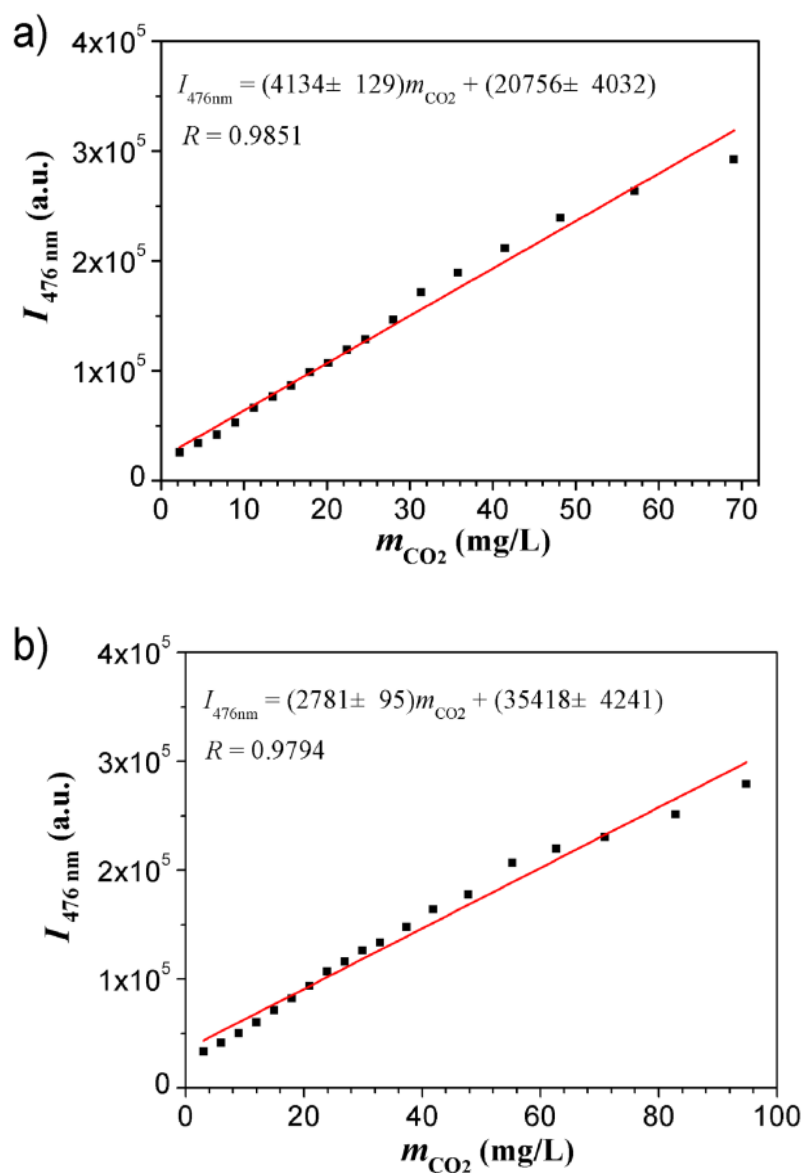

**Figure S2.** Plots of PL intensities (blue emission,  $I_{4F9/2 \rightarrow 6H15/2}$ ) of DyW<sub>10</sub>/PEO-*b*-PDMAEMA complex with DyW<sub>10</sub> concentration of (a) 0.3 mg/mL and (b) 0.4 mg/mL in aqueous solutions a function of dissolved CO<sub>2</sub> concentrations at 25 °C ( $\lambda_{\text{ex}} = 280 \text{ nm}$ ).

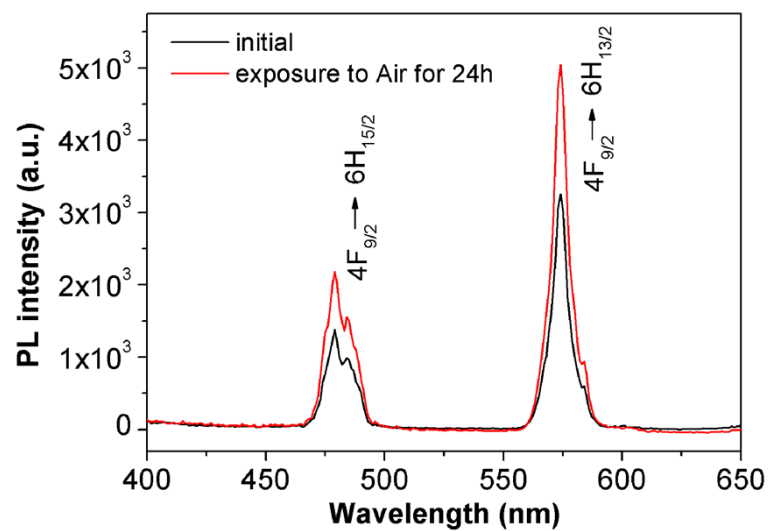

**Figure S3.** The emission spectra of DyW<sub>10</sub>/PEO-*b*-PDMAEMA hybrid complex solution before and after exposure to air for 24 h at room temperature ( $\lambda_{\text{ex}} = 280$  nm)

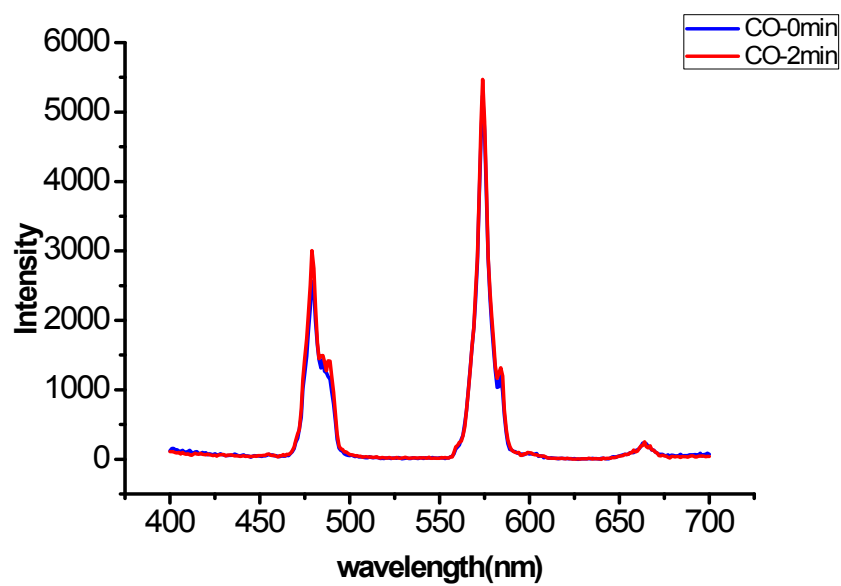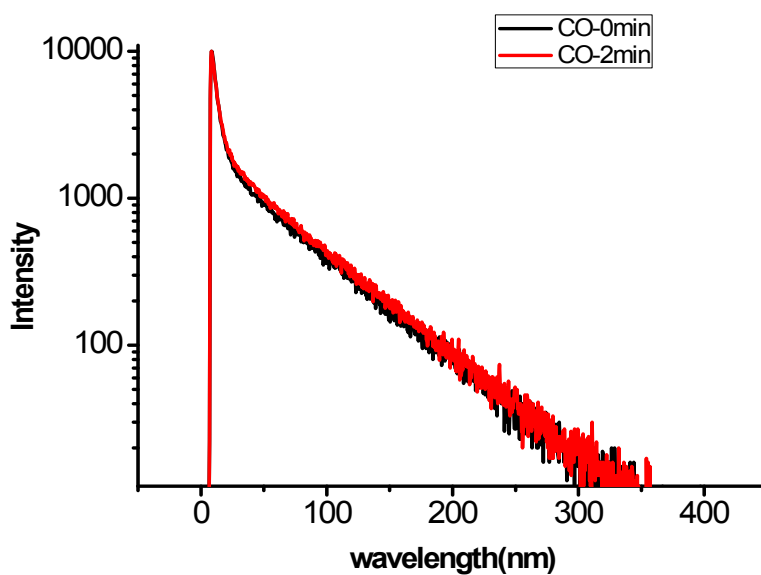

**Figure S4.** The emission spectra (up) and decay curves (down) of DyW<sub>10</sub>/ PEO<sub>113</sub>-*b*-PDMAEMA<sub>16</sub> complex solution before and after purging CO for a couple of minutes at 25 °C ( $\lambda_{\text{ex}} = 280 \text{ nm}$ )



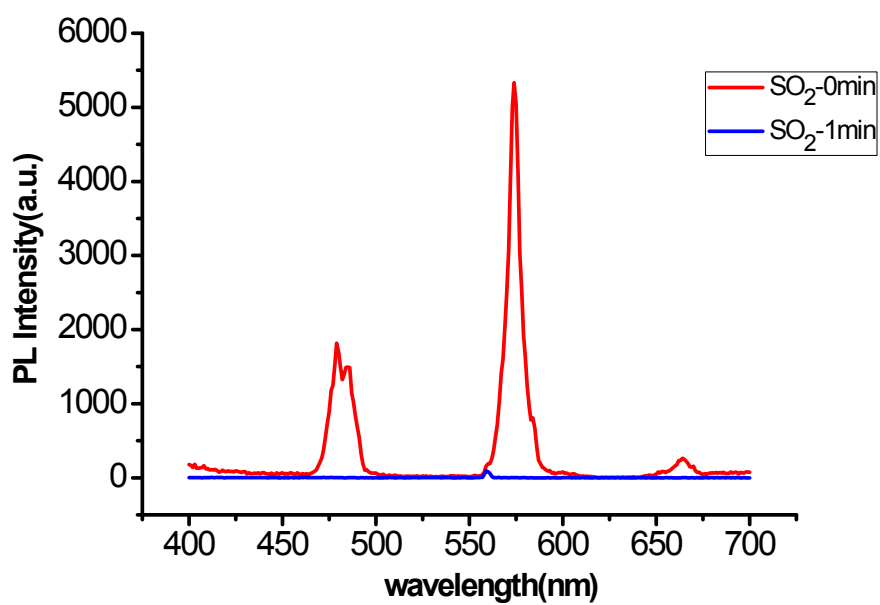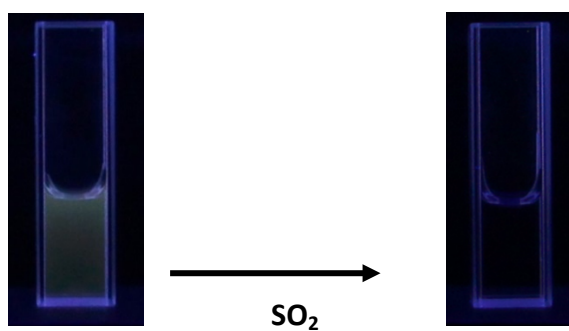

**Figure S5.** The emission spectra (up) and the corresponding photograph (down) of DyW<sub>10</sub>/PEO<sub>113</sub>-*b*-PDMAEMA<sub>16</sub> hybrid complex solution before and after purging SO<sub>2</sub> for a couple of minutes at 25 °C ( $\lambda_{\text{ex}}$  = 280 nm)

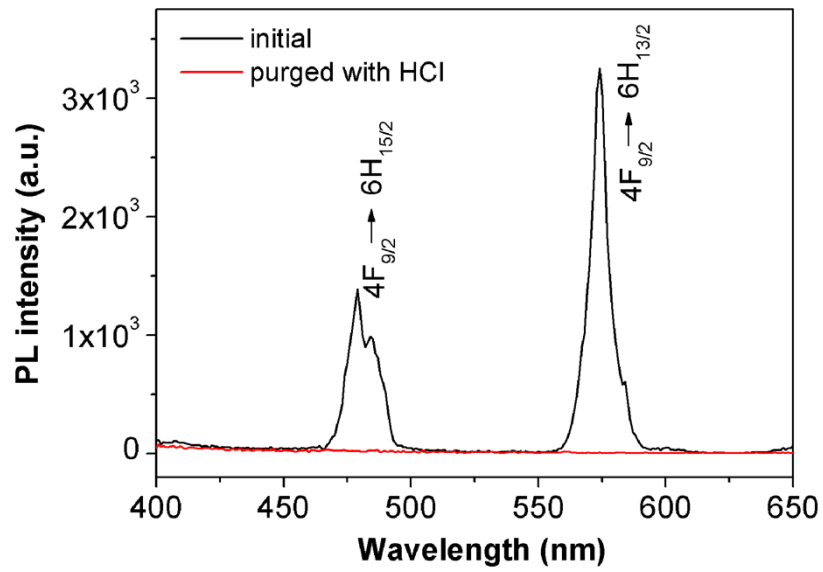

**Figure S6.** The emission spectra of DyW<sub>10</sub>/ PEO-*b*-PDMAEMA hybrid complex solution before and after purging with the HCl gas for a couple of minutes at 25 °C ( $\lambda_{\text{ex}} = 280$  nm)

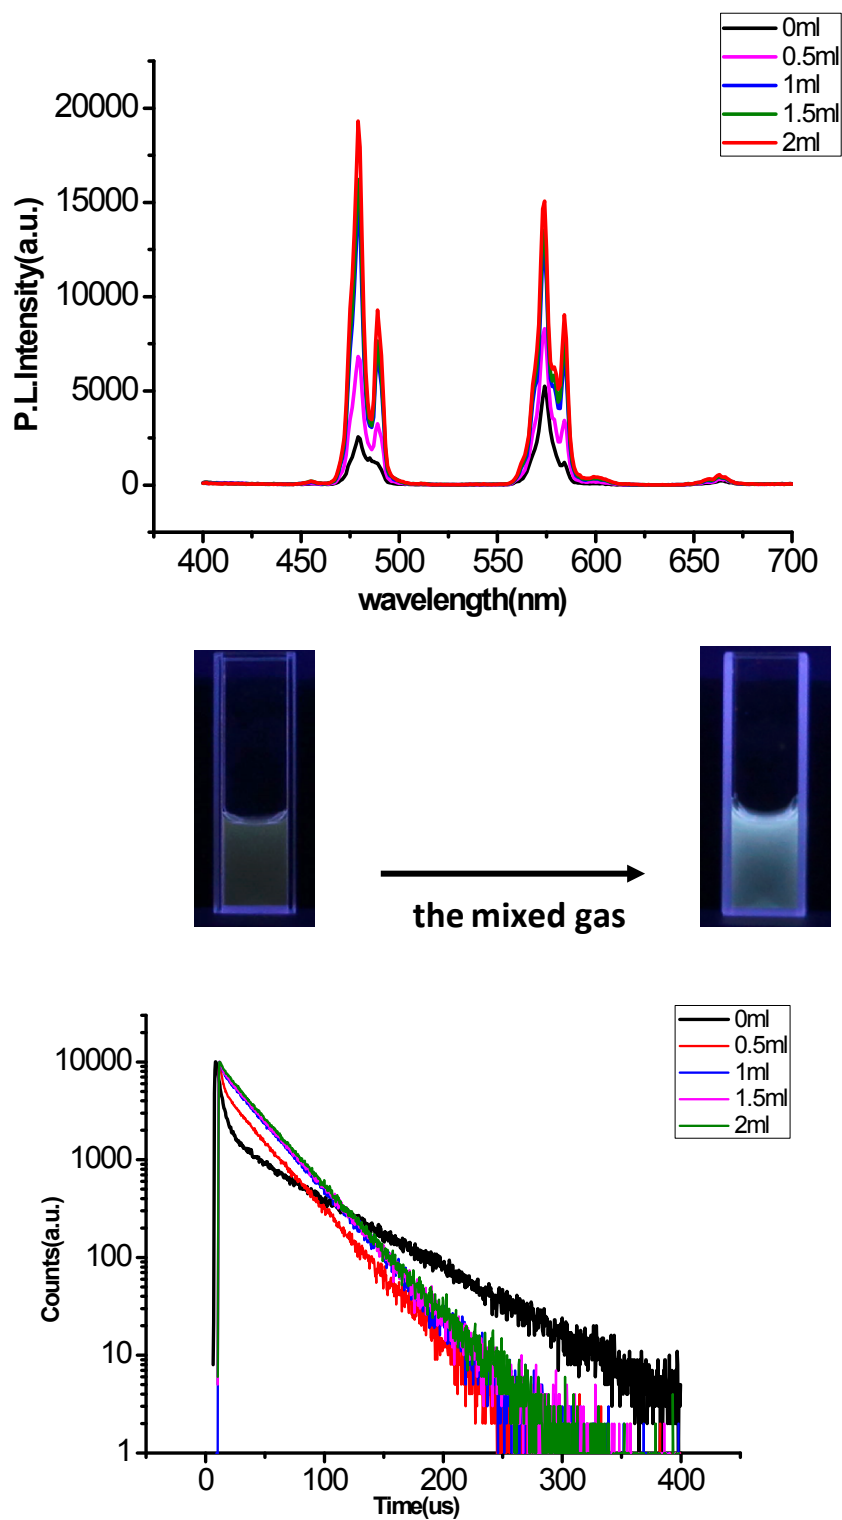

**Figure S7.** The emission spectra (up) and decay curves (down) of DyW<sub>10</sub>/ PEO<sub>113</sub>-*b*-PDMAEMA<sub>16</sub> complex solution before and after purging the mixed gas (~20% CO<sub>2</sub>, 70% N<sub>2</sub>, 10% O<sub>2</sub>, 0.1% SO<sub>2</sub>) for a couple of minutes at 25 °C ( $\lambda_{\text{ex}} = 280$  nm)

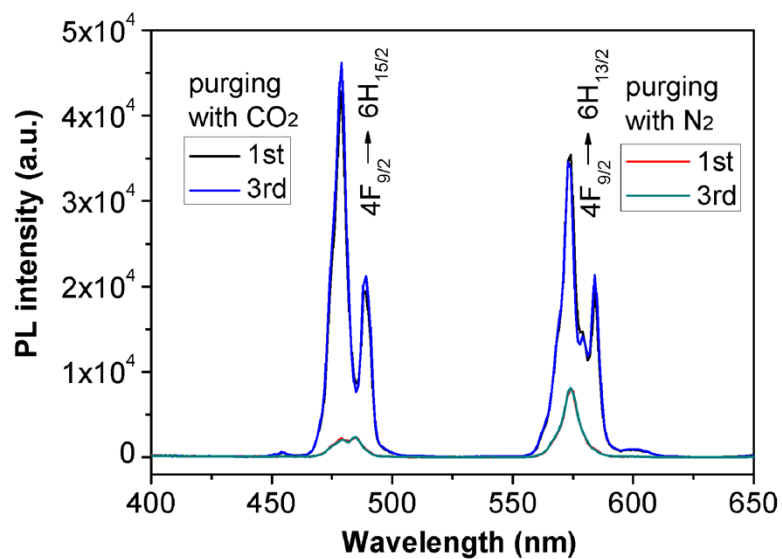

**Figure S8.** Reversible change in emission spectra ( $\lambda_{\text{ex}} = 280$  nm) of DyW<sub>10</sub>/PEO-*b*-PDMAEMA complex by alternating CO<sub>2</sub>/N<sub>2</sub> treatment.

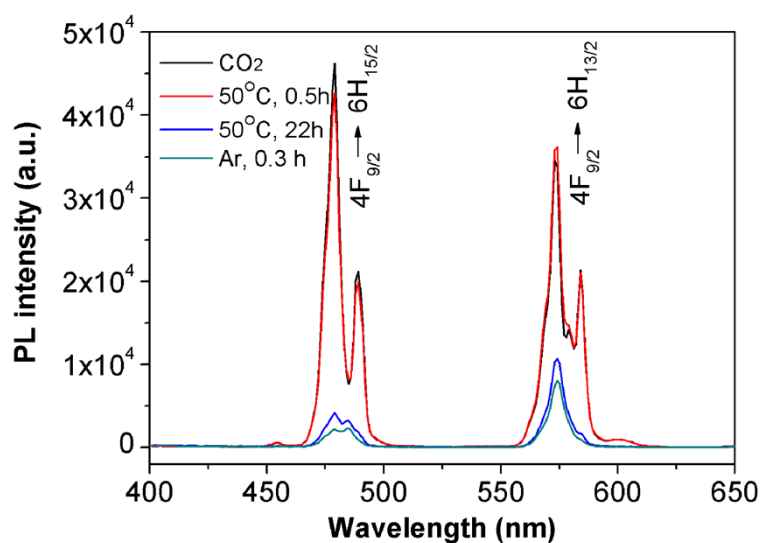

**Figure S9.** Emission spectra ( $\lambda_{\text{ex}} = 280$  nm) of DyW<sub>10</sub>/PEO-*b*-PDMAEMA hybrid complex after treatment with CO<sub>2</sub>, heating, and Ar, respectively.

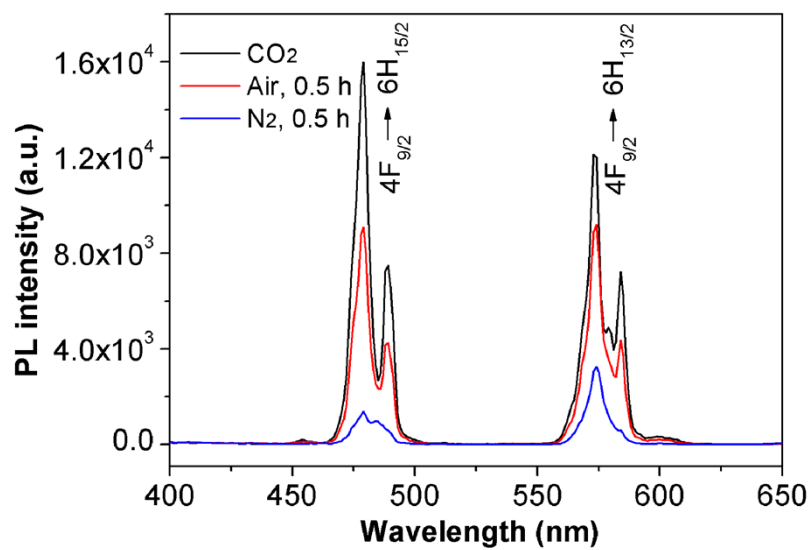

**Figure S10.** Emission spectra ( $\lambda_{\text{ex}} = 280 \text{ nm}$ ) of DyW<sub>10</sub>/PEO-*b*-PDMAEMA hybrid complex after treatment with CO<sub>2</sub>, compressed air, and N<sub>2</sub>, respectively.

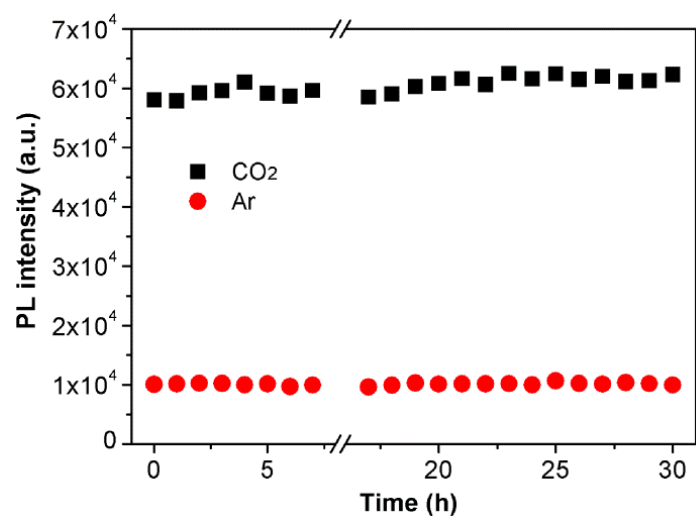

**Figure S11.** Time dependence of the luminescence intensity for DyW<sub>10</sub>/PEO-*b*-PDMAEMA solution under the two states at ambient temperature (CO<sub>2</sub>: upon exposure to CO<sub>2</sub>; Ar: upon Ar bubbling that removes CO<sub>2</sub>).

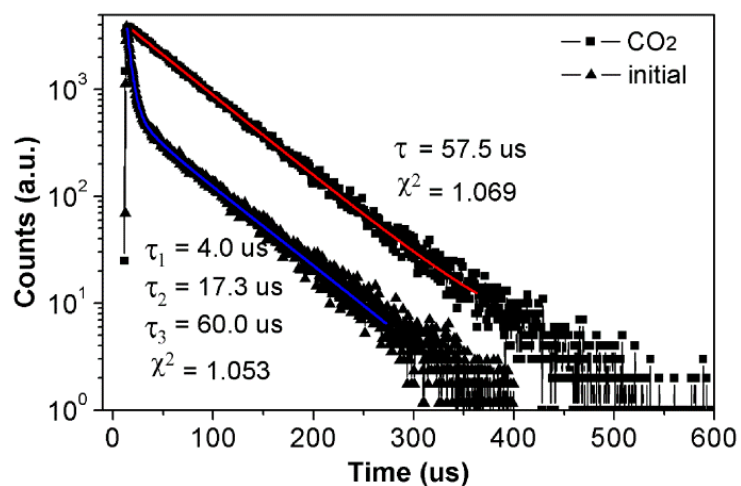

**Figure S12.** Decay curves of DyW<sub>10</sub>/PEO-*b*-PDMAEMA coassemblies in aqueous solution before and after CO<sub>2</sub> stimulation.

**Table S1.** Fitting parameters for luminescence decay curves

| Sample                                         | lifetime and its amplitude |       |                     |       |                     |       | $\chi^2$ <sup>a</sup> |
|------------------------------------------------|----------------------------|-------|---------------------|-------|---------------------|-------|-----------------------|
|                                                | $\tau_1$ ( $\mu$ s)        | $f_1$ | $\tau_2$ ( $\mu$ s) | $f_2$ | $\tau_3$ ( $\mu$ s) | $f_3$ |                       |
| DyW <sub>10</sub> (aq)                         | 5.2                        | 1.000 | ---                 | ---   | ---                 | ---   | 1.150                 |
| DyW <sub>10</sub> /copolymer                   | 4.0                        | 0.366 | 17.3                | 0.201 | 60.0                | 0.433 | 1.053                 |
| DyW <sub>10</sub> /copolymer + CO <sub>2</sub> | ---                        | ---   | ---                 | ---   | 57.5                | 1.000 | 1.069                 |
| DyW <sub>10</sub> /copolymer <sup>b</sup>      | 4.4                        | 0.264 | 20.4                | 0.164 | 58.5                | 0.572 | 1.039                 |

<sup>a</sup>Chi-squared test of the fitting curve. <sup>b</sup>Obtained by degassed CO<sub>2</sub> dissolved in the solution by purging Ar and slightly warmed to 40 °C.
